# Supplementary material for: Biodiesel Production over Banana Peel Biochar as a Sustainable Catalyst
Source: MDPI journal article supplement (doi:10.3390/catal14040266), 2024-04-16
Supplement: s1 [file s1]

Supplementary Materials

# Biodiesel Production over Banana Peel Biochar as a Sustainable Catalyst

Ana Paula Soares Dias <sup>1,2,\*</sup>, Igor Pedra <sup>3</sup>, Érica Salvador <sup>3</sup>, Bruna Rijo <sup>2</sup>, Manuel Francisco Costa Pereira <sup>1</sup>, Fátima Serralha <sup>3</sup> and Isabel Nogueira <sup>4</sup>

<sup>1</sup> CERENA, Instituto Superior Técnico, Universidade de Lisboa, Av. Rovisco Pais, 1, 1049-001 Lisboa, Portugal; mfc@tecnico.ulisboa.pt

<sup>2</sup> VALORIZA—Research Centre for Endogenous Resource Valorization, Instituto Politécnico de Portalegre, 7300-555 Portalegre, Portugal; bruna.rijo@ipportalegre.pt

<sup>3</sup> Escola Superior de Tecnologia do Barreiro, Instituto Politécnico de Setúbal, Rua Américo da Silva Marinho, 2839-001 Lavradio, Portugal; igor\_pedra99@sapo.pt (I.P.); ericasalvador.es@gmail.com (É.S.); maria.serralha@estbarreiro.ips.pt (F.S.)

<sup>4</sup> MicroLab, Instituto Superior Técnico, Universidade de Lisboa, Av. Rovisco Pais, 1049-001 Lisboa, Portugal; isabel.nogueira@tecnico.ulisboa.pt

\* Correspondence: apsoares@tecnico.ulisboa.pt

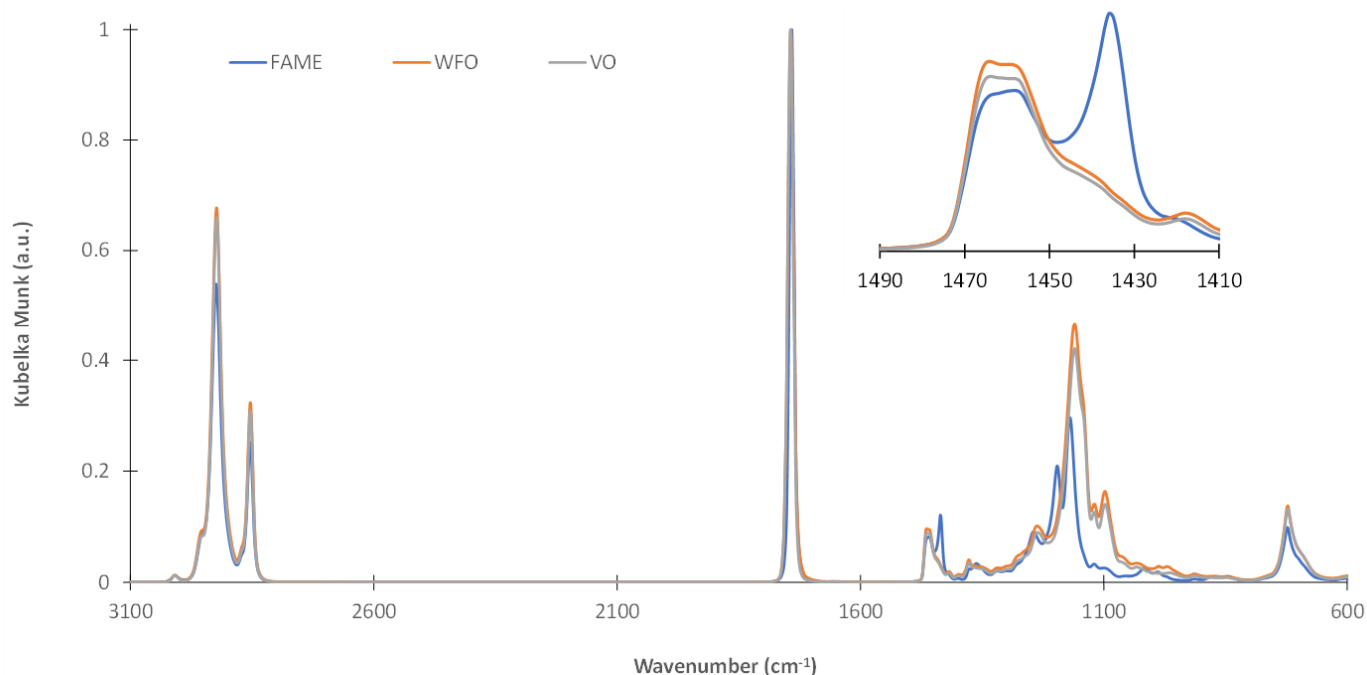

**Figure S1.** – FTIR of FAME (purified), WFO and VO.
